# Supplementary material for: Combined Mapping of Multiple clUsteriNg ALgorithms (COMMUNAL): A Robust Method for Selection of Cluster Number, K
Source: PubMed Central journal article supplement (PMC4652212; doi:10.1038/srep16971), 2015-11-19
Supplement: srep16971-s1.pdf [file srep16971-s1.pdf]

## Supplementary Information

COmbined Mapping of Multiple clUsteriNg ALgorithms (COMMUNAL): A Robust Method for Selection of Cluster Number, K

Timothy E Sweeney, MD, PhD <sup>1,2,†,\*</sup>, Albert Chen, MS <sup>3,†</sup>, Olivier Gevaert, PhD <sup>2,\*</sup>

1 – Institute for Immunity, Transplantation and Infection, Stanford University

2 – Biomedical Informatics Research, Stanford University

3 – Department of Statistics, Stanford University

† - These authors contributed equally to this work

\* - Corresponding authors: tes17@stanford.edu, olivier.gevaert@gmail.com

- Steepest non-edge maximum for given gene subset
- Overall maximum for given gene subset

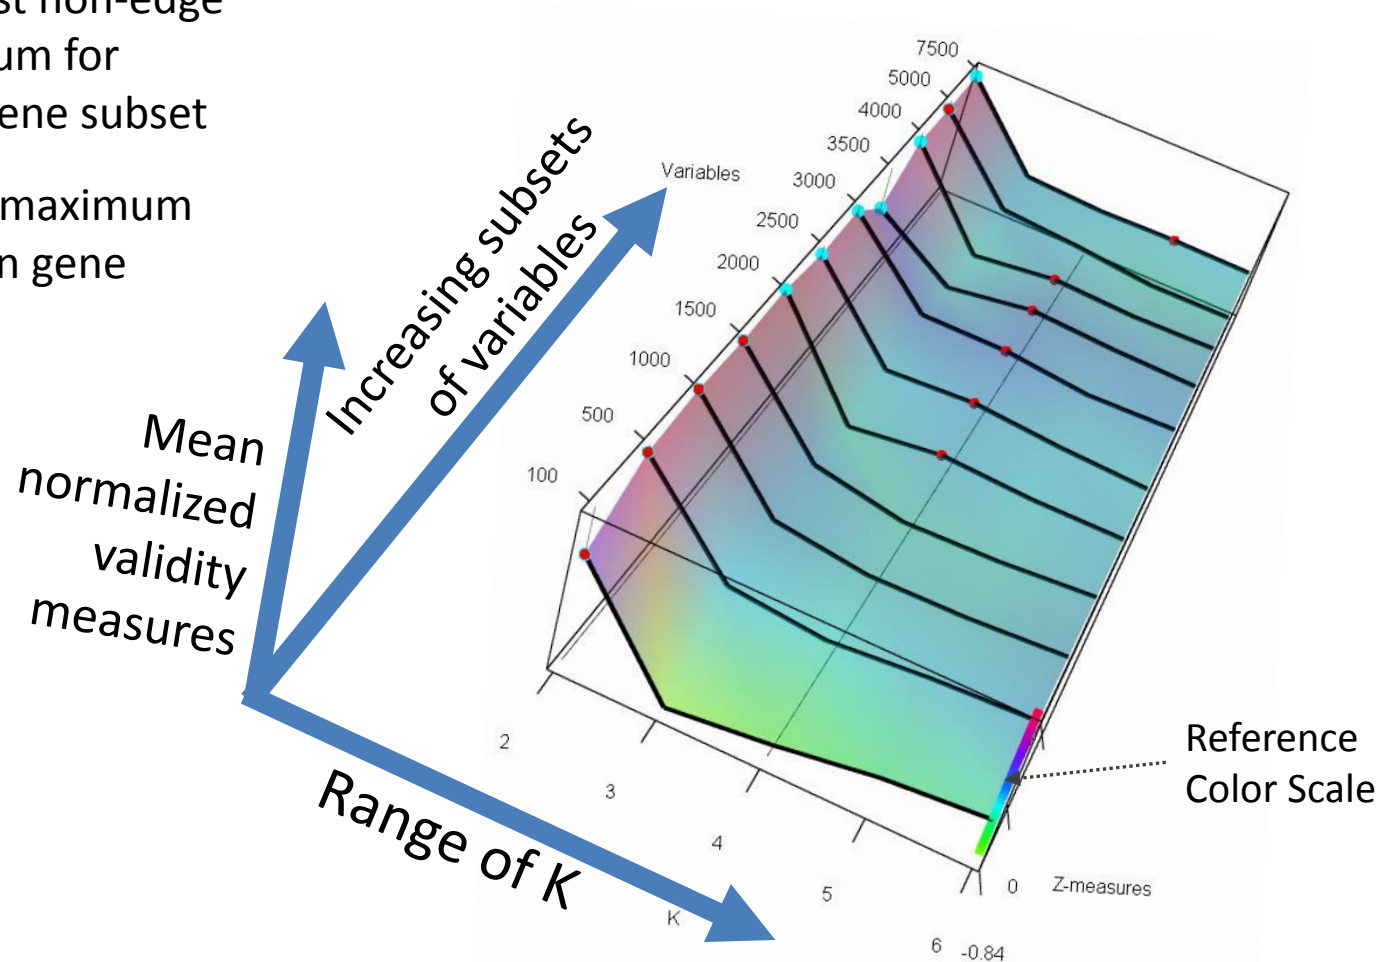

Supplemental Figure S1. Schematic of example COMMUNAL 3D map. Axis labels are shown at left. Red dots indicate steepest non-edge maximum for given gene subset; pale blue dots indicate overall maximum for given subset.

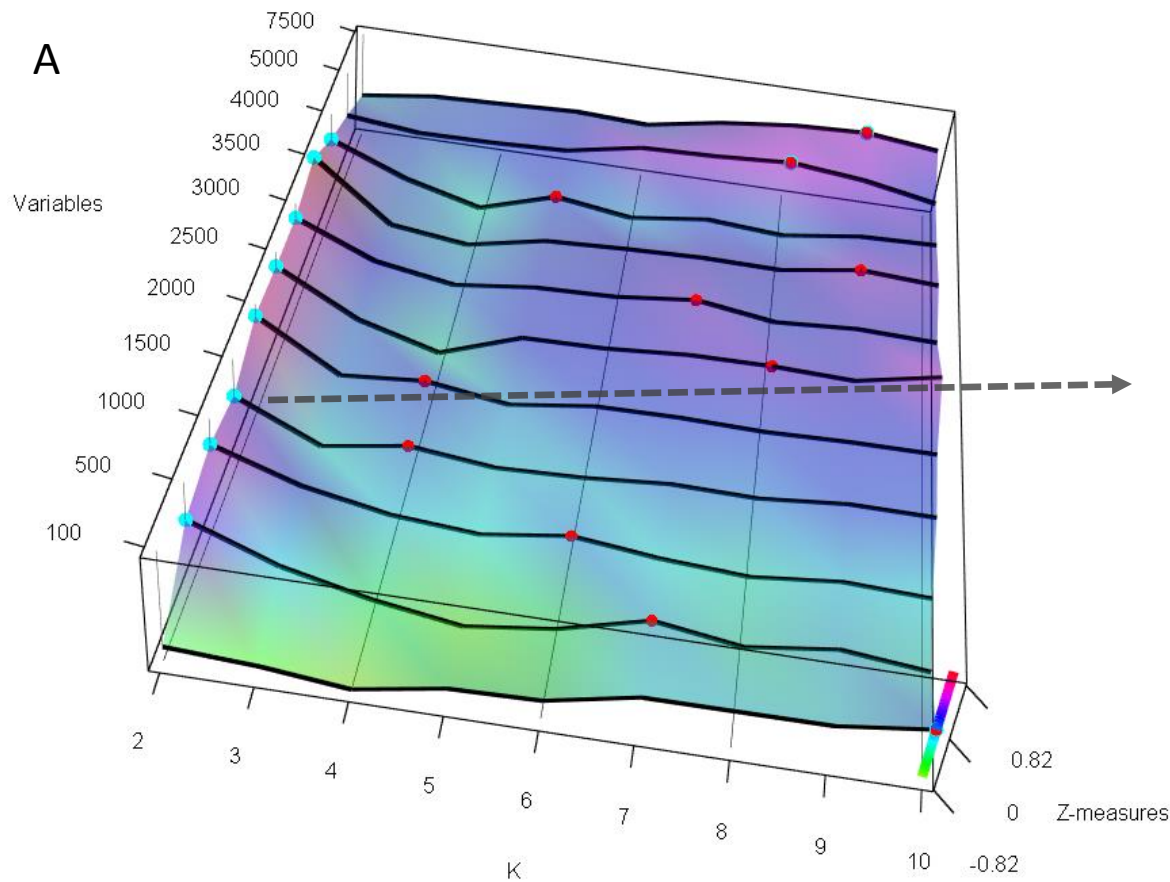

**B**

COMMUNAL optimal cluster counts at 1500 genes

|                              |   | 1  | 2  | NA |
|------------------------------|---|----|----|----|
| Broad optimal cluster counts | 1 | 48 | 2  | 2  |
|                              | 2 | 0  | 41 | 0  |
|                              | 3 | 4  | 72 | 1  |
|                              | 4 | 0  | 52 | 0  |

Supplemental Figure S2. COMMUNAL output for the Broad colorectal adenocarcinoma (COADREAD). (A) 3D map of K vs. genes included vs. standardized validity measures showing optima at K=2. (B) Comparison of COMMUNAL core cluster assignment counts vs. Broad CCP-hierarchical cluster assignment counts at 1500 genes for K=2 ( $\lambda = 0.83$ ).

**A**

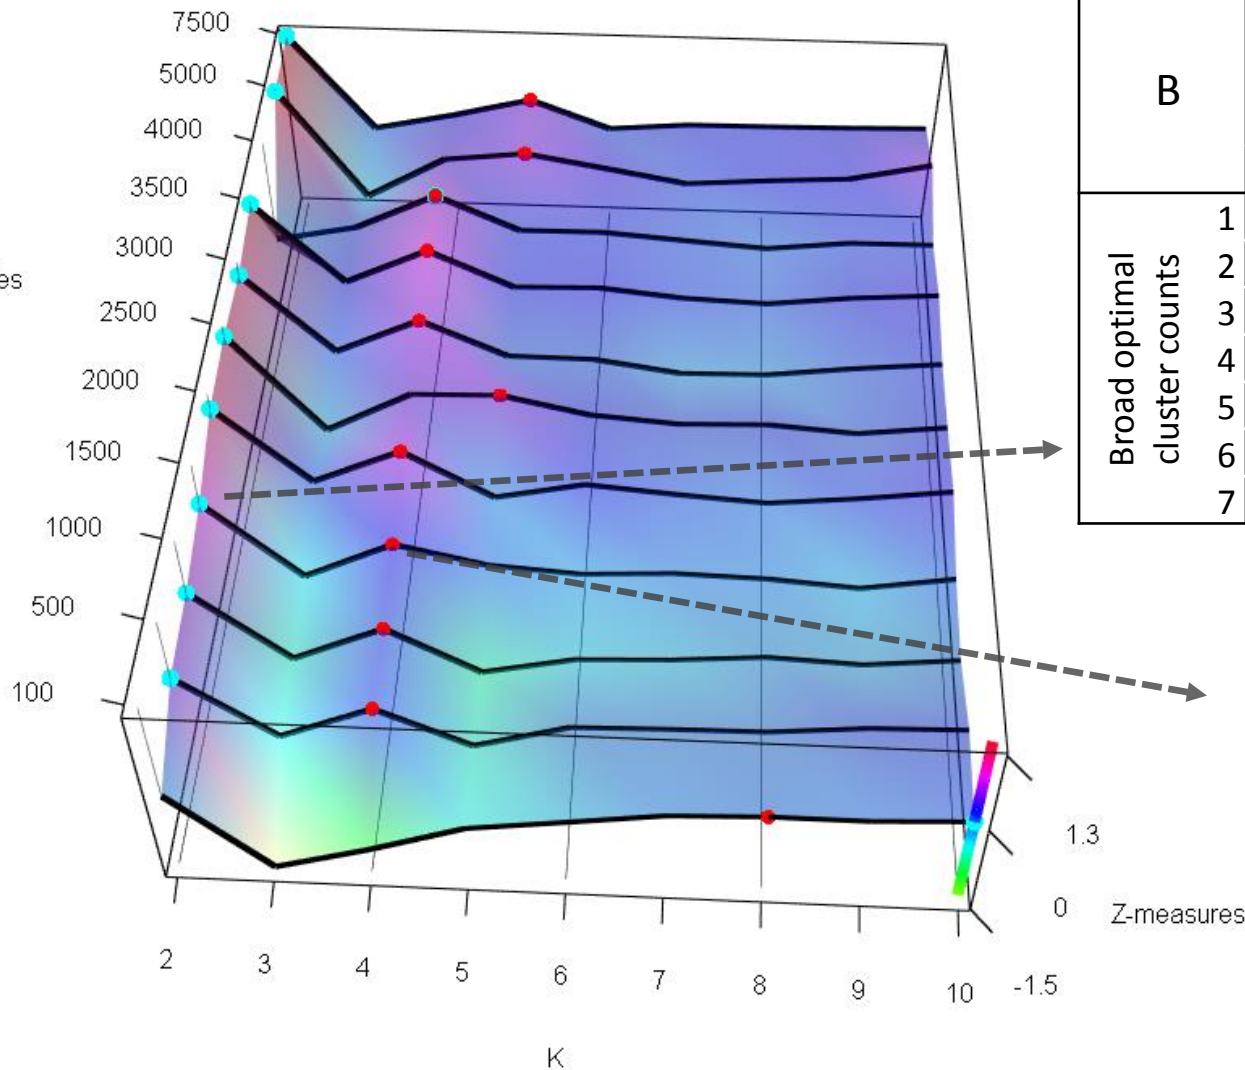

| <b>B</b>                     |   | COMMUNAL optimal cluster counts at 1500 genes |    |
|------------------------------|---|-----------------------------------------------|----|
|                              |   | 1                                             | 2  |
| Broad optimal cluster counts | 1 | 12                                            | 0  |
|                              | 2 | 12                                            | 0  |
|                              | 3 | 4                                             | 0  |
|                              | 4 | 11                                            | 0  |
|                              | 5 | 13                                            | 0  |
|                              | 6 | 9                                             | 0  |
|                              | 7 | 0                                             | 11 |

| <b>C</b>                     |   | COMMUNAL optimal cluster counts at 1500 genes |    |   |    |
|------------------------------|---|-----------------------------------------------|----|---|----|
|                              |   | 1                                             | 2  | 3 | 4  |
| Broad optimal cluster counts | 1 | 12                                            | 0  | 0 | 0  |
|                              | 2 | 0                                             | 12 | 0 | 0  |
|                              | 3 | 0                                             | 0  | 4 | 0  |
|                              | 4 | 0                                             | 11 | 0 | 0  |
|                              | 5 | 13                                            | 0  | 0 | 0  |
|                              | 6 | 9                                             | 0  | 0 | 0  |
|                              | 7 | 0                                             | 0  | 1 | 10 |

Supplemental Figure S3. COMMUNAL output for the Broad renal cell carcinoma (KIRC). (A) 3D map of K vs. genes included vs. standardized validity measures showing highly stable optima at K=2 and K=4. (B, C) Comparison of COMMUNAL core cluster assignment counts vs. Broad CCP-hierarchical cluster assignment counts at 1500 genes for (B) K=2 ( $\lambda=1.0$ ) and (C) K=4 ( $\lambda=0.97$ ).

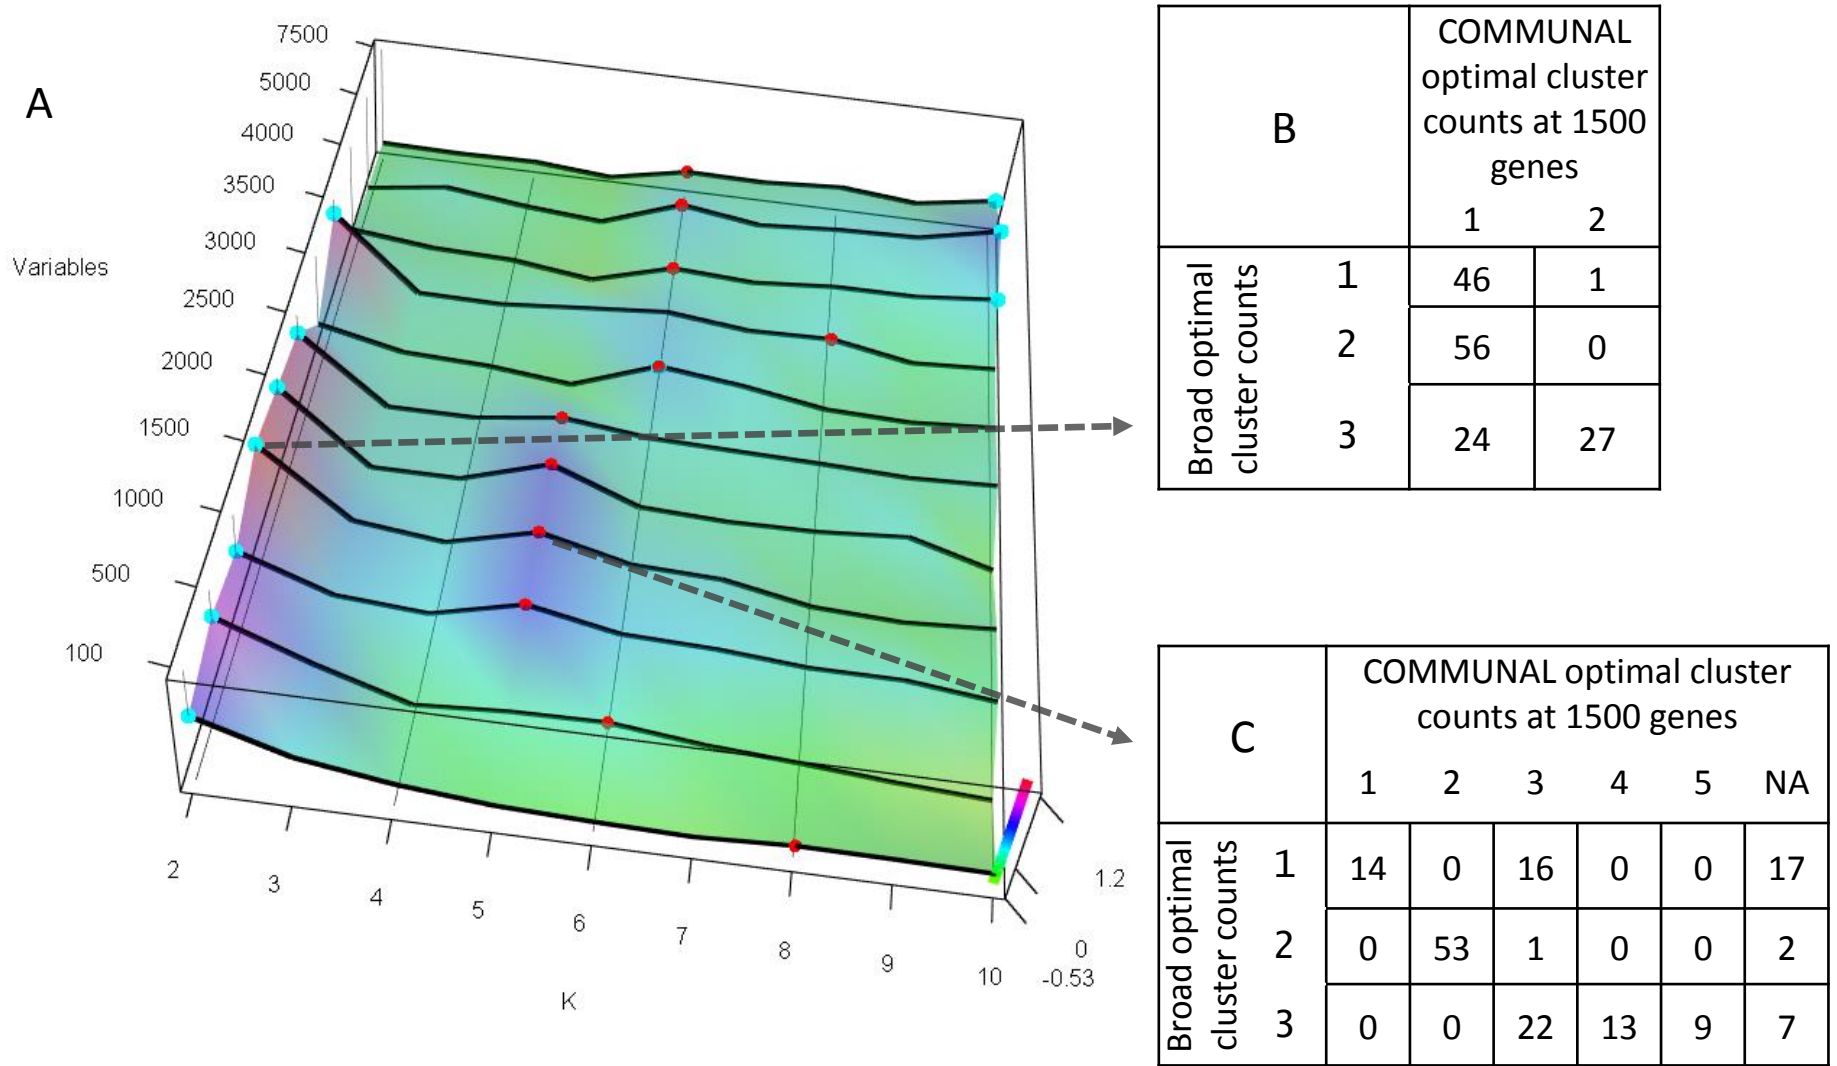

Supplemental Figure S4. COMMUNAL output for lung squamous cell carcinoma (LUSC). (A) 3D map of K vs. genes included vs. standardized validity measures showing stability, at K=2 and then K=5→6. (B, C) Comparison of COMMUNAL core cluster assignment counts vs. Broad CCP-hierarchical cluster assignment counts at 1500 genes; (B) at K=2, lambda=0.27; (C) at K=5, lambda=0.73.

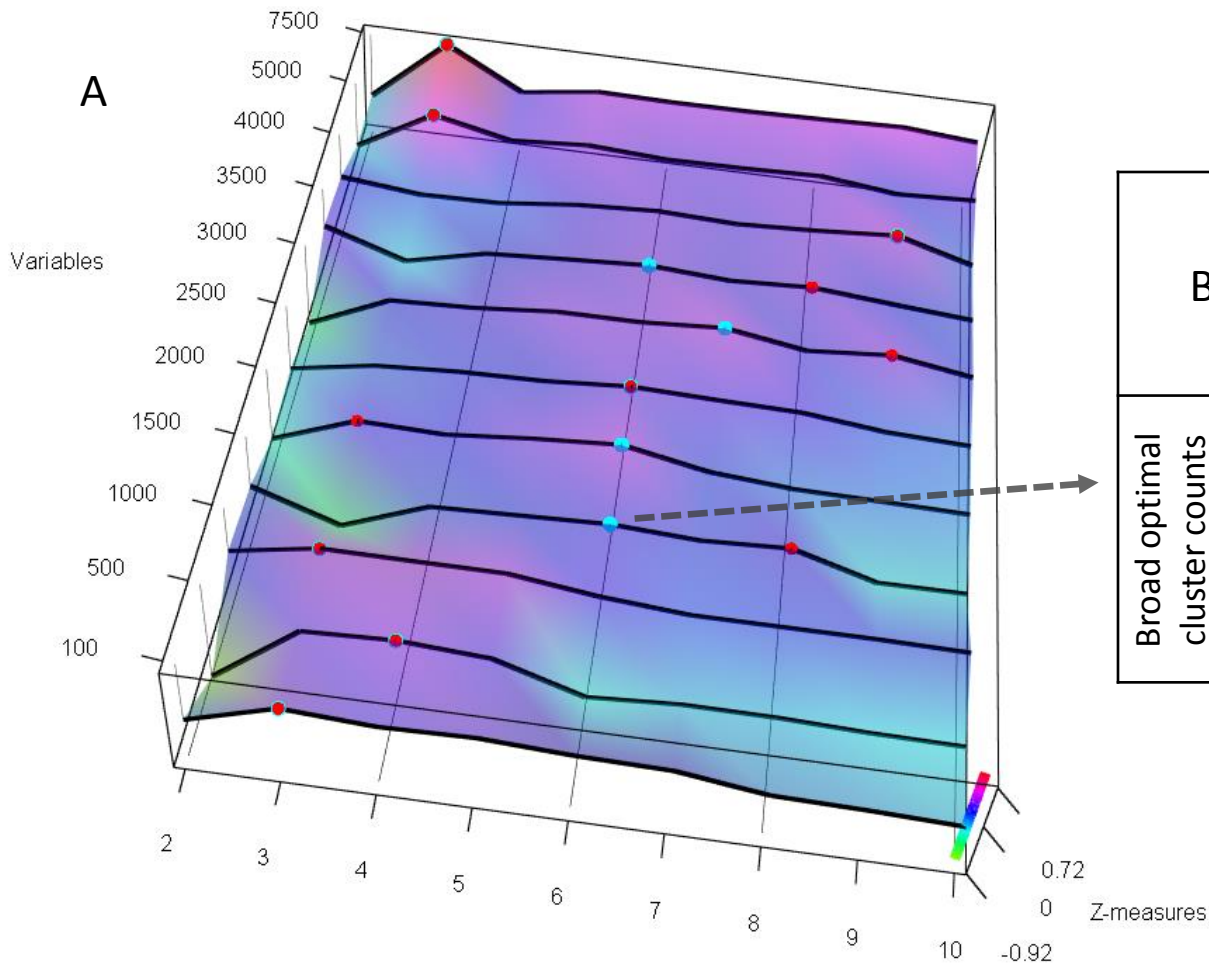

**B**

|                              |   | COMMUNAL optimal cluster counts at 1500 genes |     |   |    |    |    |    |
|------------------------------|---|-----------------------------------------------|-----|---|----|----|----|----|
|                              |   | 1                                             | 2   | 3 | 4  | 5  | 6  | NA |
| Broad optimal cluster counts | 1 | 106                                           | 19  | 0 | 10 | 69 | 17 | 96 |
|                              | 2 | 3                                             | 141 | 0 | 0  | 8  | 0  | 10 |
|                              | 3 | 3                                             | 5   | 0 | 75 | 0  | 0  | 7  |

Supplemental Figure S5. COMMUNAL output for ovarian cancer (OV). (A) 3D map of K vs. genes included vs. standardized validity measures has no stable clustering, showing the importance of testing over multiple gene sets. (B) Comparison of COMMUNAL core cluster assignment counts vs. Broad CCP-hierarchical cluster assignment counts at 1500 genes; at K=6, lambda=0.74.

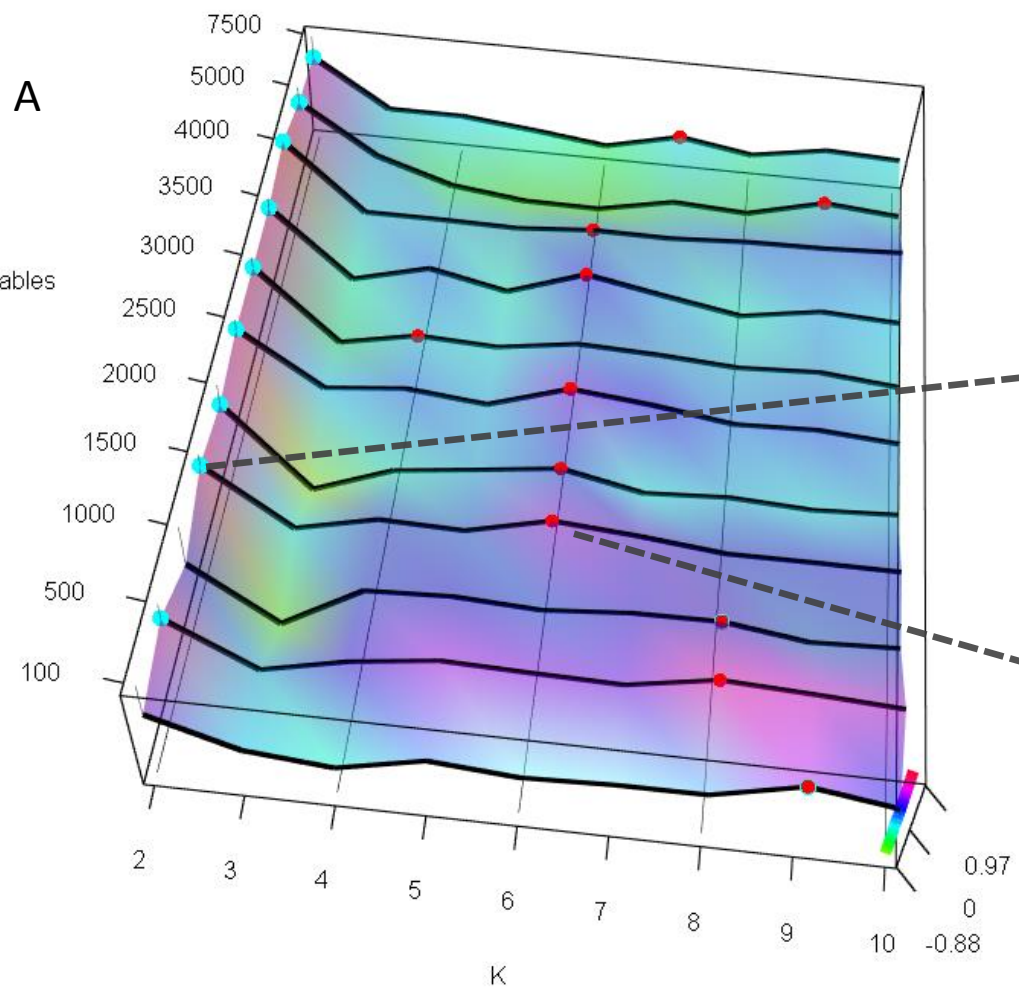

| B                            |   | COMMUNAL optimal cluster |    |
|------------------------------|---|--------------------------|----|
|                              |   | 1                        | 2  |
| Broad optimal cluster counts | 1 | 9                        | 5  |
|                              | 2 | 10                       | 0  |
|                              | 3 | 0                        | 7  |
|                              | 4 | 0                        | 7  |
|                              | 5 | 0                        | 16 |

| C                            |   | COMMUNAL optimal cluster counts at 1500 genes |   |   |    |   |    |    |
|------------------------------|---|-----------------------------------------------|---|---|----|---|----|----|
|                              |   | 1                                             | 2 | 3 | 4  | 5 | 6  | NA |
| Broad optimal cluster counts | 1 | 3                                             | 4 | 2 | 0  | 0 | 1  | 4  |
|                              | 2 | 0                                             | 0 | 0 | 0  | 0 | 10 | 0  |
|                              | 3 | 0                                             | 0 | 6 | 0  | 0 | 0  | 1  |
|                              | 4 | 0                                             | 0 | 7 | 0  | 0 | 0  | 0  |
|                              | 5 | 0                                             | 0 | 0 | 12 | 0 | 0  | 4  |

Supplemental Figure S6. COMMUNAL output for uterine corpus endometrial carcinoma (UCEC). (A) 3D map of K vs. genes included vs. standardized validity measures shows unstable clustering except at K=2. (B, C) Comparison of COMMUNAL core cluster assignment counts vs. Broad CCP-hierarchical cluster assignment counts at 1500 genes for (B) K=2 (lambda=0.74) and (C) K=6 (lambda=0.63).

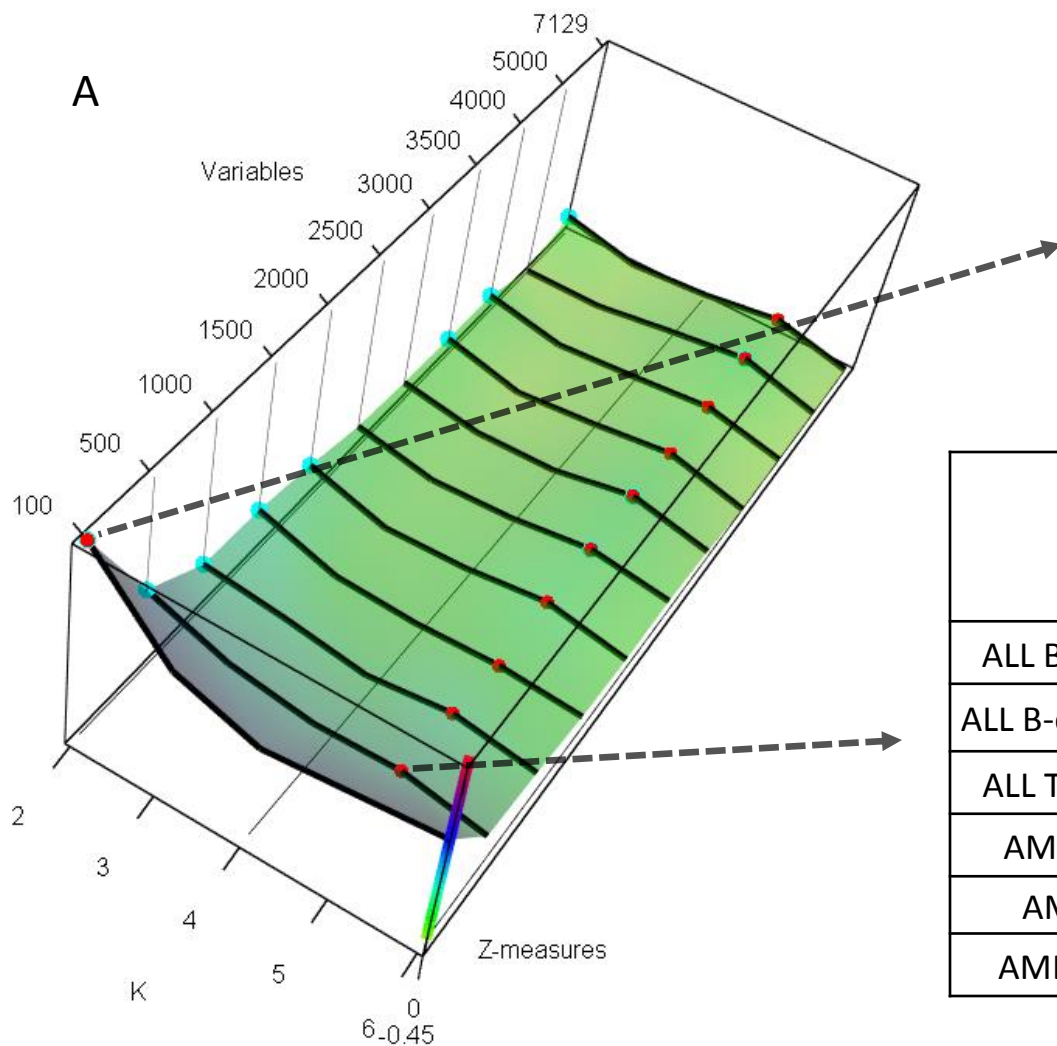

**B**

COMMUNAL optimal cluster counts at 100 genes

| Type       | 1  | 2 | NA |
|------------|----|---|----|
| ALL B-cell | 34 | 3 | 1  |
| ALL T-cell | 7  | 2 | 0  |
| AML        | 16 | 8 | 0  |

**C**

COMMUNAL optimal cluster counts at 1500 genes

|                     | 1  | 2 | 3 | 4 | 5 | NA |
|---------------------|----|---|---|---|---|----|
| ALL B-cell, DFCI    | 29 | 2 | 2 | 0 | 2 | 0  |
| ALL B-cell, St-Jude | 0  | 3 | 0 | 0 | 0 | 0  |
| ALL T-cell, DFCI    | 1  | 0 | 1 | 0 | 7 | 0  |
| AML, CALGB          | 1  | 1 | 2 | 9 | 0 | 1  |
| AML, CCG            | 1  | 2 | 1 | 1 | 0 | 0  |
| AML, St-Jude        | 0  | 5 | 0 | 0 | 0 | 0  |

Supplemental Figure S7. COMMUNAL assessment of the entire Golub leukemia dataset. (A) 3D map of K vs. genes included vs. standardized validity measures showing optima at K=2 and K=4. (B) Core cluster assignment counts at K=2 at 100 genes vs. main leukemia type. (C) Core cluster assignment counts at K=4 at 500 genes vs. leukemia subtypes (AML, ALL-T-Cell and ALL-B-Cell);  $\lambda = 0.15$ . (D) Core cluster assignment counts at K=5 at 500 genes vs. hospital enrollment sites;  $\lambda = 0.58$ .



Supplemental Table S1.  
Listing of algorithms  
and metrics used in  
each 3D plot of  
COMMUNAL.

|                 |                                                              |
|-----------------|--------------------------------------------------------------|
| <b>BRCA</b>     |                                                              |
| Algorithms      | hierarchical, kmeans, som, sota, pam, agnes                  |
| Measures        | gap statistic, dunn index 2, dunn index, g3                  |
| <b>COADREAD</b> |                                                              |
| Algorithms      | hierarchical, kmeans, som, pam, agnes                        |
| Measures        | gap statistic, dunn index, g3, dunn index 2                  |
| <b>GBM</b>      |                                                              |
| Algorithms      | hierarchical, kmeans, som, pam, clara, agnes                 |
| Measures        | Widest gap, dunn index, g3, min. separation                  |
| <b>KIRC</b>     |                                                              |
| Algorithms      | hierarchical, kmeans, som, agnes                             |
| Measures        | gap statistic, avg. between, g2, g3                          |
| <b>LUSC</b>     |                                                              |
| Algorithms      | hierarchical, kmeans, som, pam, agnes                        |
| Measures        | gap statistic, pearson gamma, dunn index, dunn index 2       |
| <b>OV</b>       |                                                              |
| Algorithms      | hierarchical, kmeans, som, sota, pam, agnes                  |
| Measures        | gap statistic, pearson gamma, g3, dunn index 2               |
| <b>UCEC</b>     |                                                              |
| Algorithms      | hierarchical, kmeans, som, agnes                             |
| Measures        | gap statistic, g2, dunn index, dunn index 2                  |
| <b>Golub</b>    |                                                              |
| Algorithms      | hierarchical, kmeans, som, pam, clara, agnes                 |
| Measures        | gap statistic, widest gap, g3, dunn index 2, avg. silhouette |
